# Supplementary material for: Hydrophilic hollow carbon nanocapsules for high-capacity adsorptive removal of cationic dyes in aqueous systems
Source: Royal Society of Chemistry journal article supplement (doi:10.1039/c4ra13396j), 2014-12-08
Supplement: c4ra13396j1.pdf [file c4ra13396j1.pdf]

## Supporting information

### Hydrophilic hollow carbon nanocapsules for high-capacity adsorptive removal of cationic dyes in aqueous systems

Ray-Tung Chiang,<sup>a,b</sup> Ray-Kuang Chiang,<sup>a,\*</sup> and Fuh-Sheng Shieu<sup>b,\*</sup>

<sup>a</sup>Nanomaterials Laboratory, Department of Materials Science and Engineering, Far East University, Hsing-Shih, Tainan 74448, Taiwan, and <sup>b</sup>Department of Materials Science and Engineering, National Chung Hsing University, Taichung 402, Taiwan

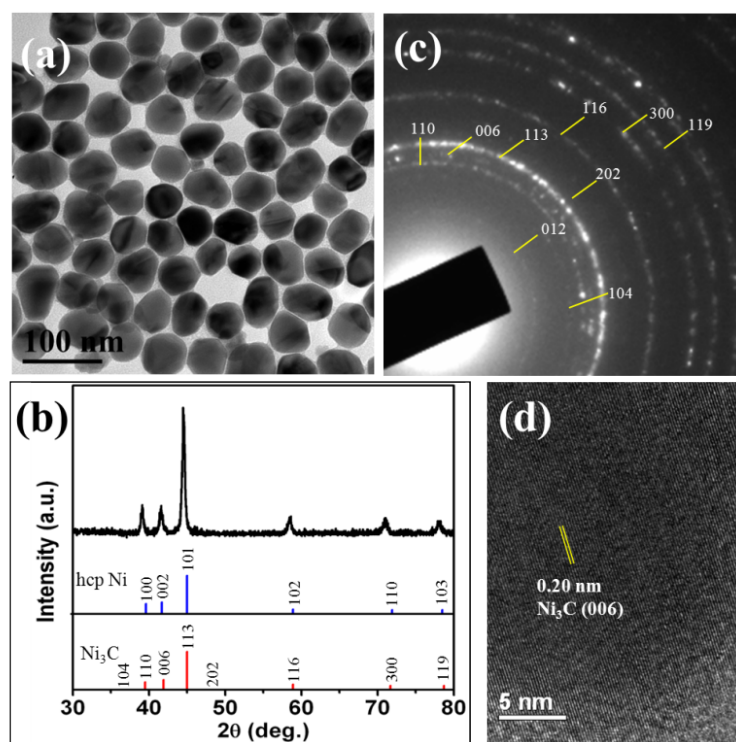

Fig. S1 (a) TEM image, (b) XRD pattern, (c) SAED image and (d) HRTEM image of as-synthesized Ni<sub>3</sub>C products.

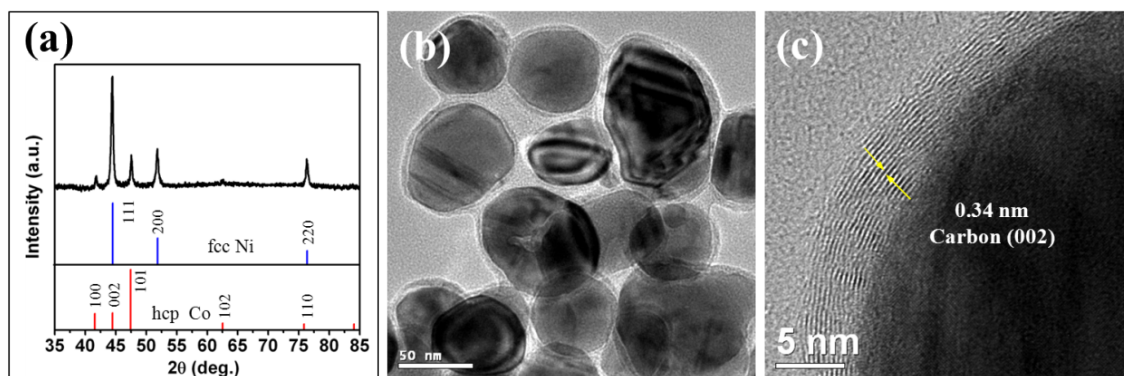

Fig. S2 (a) XRD pattern, (b) TEM image and (c) HRTEM image of  $\text{Ni}_3\text{C}$  NP products decomposed at  $500^\circ\text{C}$  for 10 min.

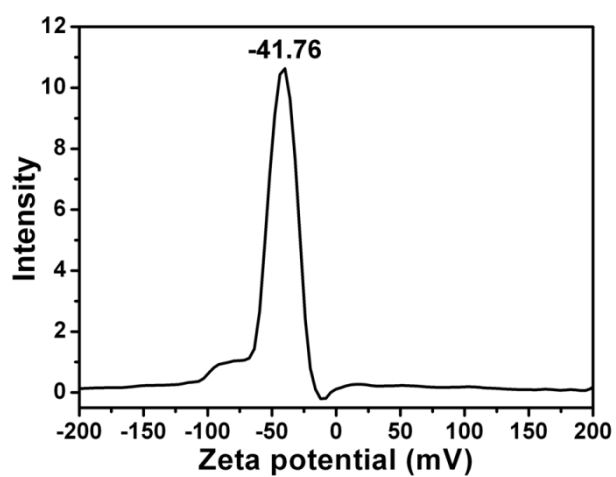

Fig. S3 Zeta potential of HCNs in DI water ( $V = 20 \text{ mL}$ ,  $m = 1 \text{ mg}$ ,  $\text{pH} = 6.0 \pm 0.1$ ).

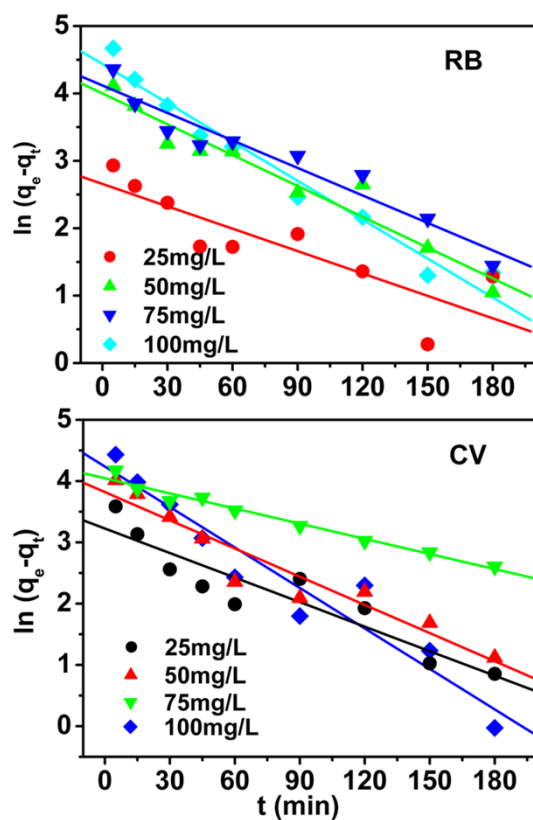

Fig. S4 Plots of pseudo-first-order kinetic model for adsorption of RB (upper) and CV (lower) dyes on HCNs.

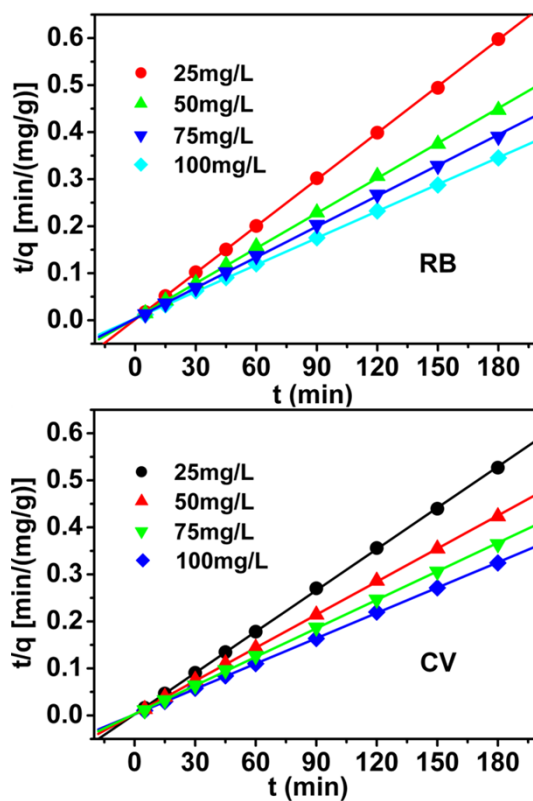

Fig. S5 Plots of pseudo-second-order kinetic model for adsorption of RB (upper) and CV (lower) dyes on HCNs.

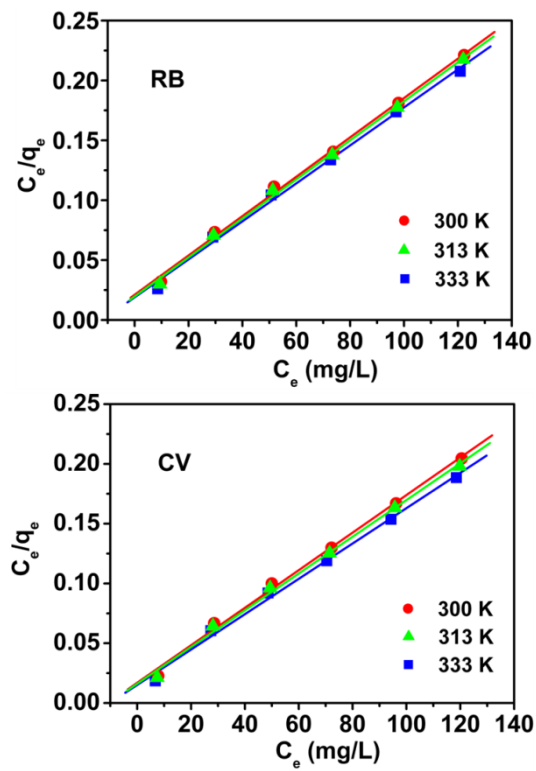

Fig. S6 Plots obtained from Langmuir isotherm model for adsorption of RB (upper) and CV (lower) dyes on HCNs.

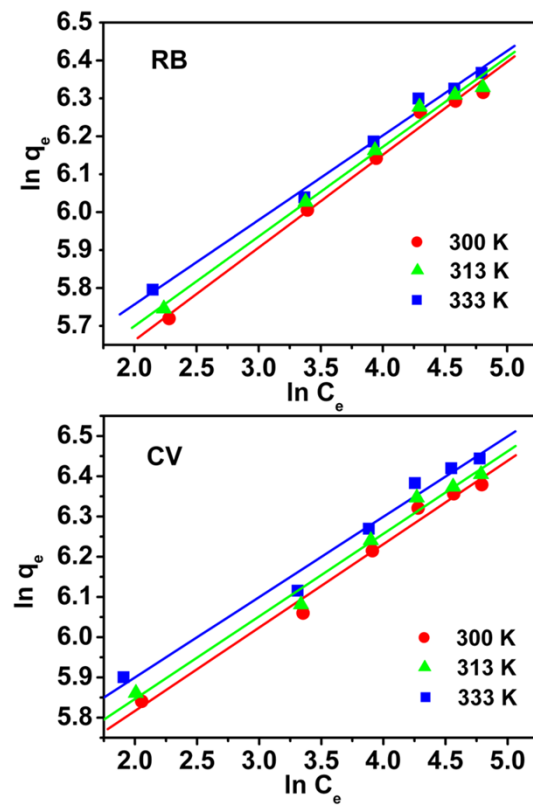

Fig. S7 Plots obtained from Freundlich isotherm modal for adsorption of RB (upper) and CV (lower) dyes on HCNs.

Table S1 Comparison of maximum adsorption capacity of HCNs and other carbonaceous adsorbents for RB and CV dyes.

| Adsorbent                                 | Adsorbate | $C_{0-max}$ (mg/L) | $q_m$ (mg/g) | Refs.     |
|-------------------------------------------|-----------|--------------------|--------------|-----------|
| HCNs                                      | RB        | 150                | 628.93       | This work |
| Exfoliated graphene oxide                 | RB        | 10                 | 1.24         | 1         |
| Pyrolytic tire char activated carbon      | RB        | 150                | 312.5        | 2         |
| Bagasse pith activated carbon             | RB        | 600                | 263.85       | 3         |
| Phoenix sylvestric leave activated carbon | RB        | 60                 | 51.55        | 4         |
| Graphene sponge                           | RB        | ~95.8              | 72.5         | 5         |
| Sago waste activated carbon               | RB        | 40                 | 16.2         | 6         |
| Cashew husk based activated carbon        | RB        | 350                | 250          | 7         |
| HCNs                                      | CV        | 150                | 675.68       | This work |
| Phosphoric acid activated carbons         | CV        | 180                | 60.4         | 8         |
| Sulfuric acid activated carbons           | CV        | 180                | 85.84        | 8         |
| Tomato paste waste activated carbon       | CV        | 350                | 68.97        | 9         |
| Jute fiber carbon                         | CV        | 110                | 27.99        | 10        |
| Sulfuric acid activated carbons           | CV        | 100                | 64.87        | 11        |
| Zinc chloride activated carbons           | CV        | 100                | 61.57        | 11        |
| Waste apricot activated carbon            | CV        | 400                | 91.74        | 12        |
| Apple rind activated carbon               | CV        | 100                | 19.8         | 13        |

## References

1. G. K. Ramesha, A. V. Kumara, H. B. Muralidhara and S. Sampath, *J. Colloid Interf. Sci.*, 2011, 361, 270-277.
2. L. Li, S. Liu<sup>1</sup> and T. Zhu, *J. Environ. Sci.*, 2010, **22(8)**, 1273-1280.
3. H. M. H. Gad and A. El-Sayed, *J. Hazard. Mater.*, 2009, **168**, 1070-1081.
4. S. Arivoli and M. Thenkuzhali, *E-J. Chem.*, 2008, **5**, 187-200.
5. J. P. Zhao, W. C. Ren and H. Mi. Cheng, *J. Mater. Chem.*, 2012, **22**, 20197-20202.

6. K. Kadirvelu, C. Karthika, N. Vennilamani and S. Pattabhi, *Chemosphere*, 2005, **60**, 1009-1017.
7. J. Anandkumar and B. Mandal, *J. Hazard. Mater.*, 2011, **186**, 1088-1096.
8. S. Senthilkumaar, P. Kalaamani and C.V. Subburaam, *J. Hazard. Mater.*, 2006, **136**, 800-808.
9. F. Guzel, H. Saygili, G. A. Saygili and F. Koyuncu, *J. Ind. Eng. Chem.*, 2014, **20**, 3375-3386.
10. K. Porkodi and K.V. Kumar, *J. Hazard. Mater.*, 2007, **143**, 311-327.
11. K. Mohanty, J. T. Naidu, B. C. Meikap and M. N. Biswas, *Ind. Eng. Chem. Res.*, 2006, **45**, 5165-5171.
12. C. A. Basar, *J. Hazard. Mater.*, 2006, **B135**, 232-241.
13. R. Malarvizhi and Y. S. Ho, *Desalination*, 2010, **264**, 97-101.
